# Supplementary material for: Drosophila Food-Associated Pheromones: Effect of Experience, Genotype and Antibiotics on Larval Behavior
Source: PubMed Central journal article supplement (PMC4795598; doi:10.1371/journal.pone.0151451), 2016-03-17
Supplement: pone.0151451.s007.pdf [file pone.0151451.s007.pdf]

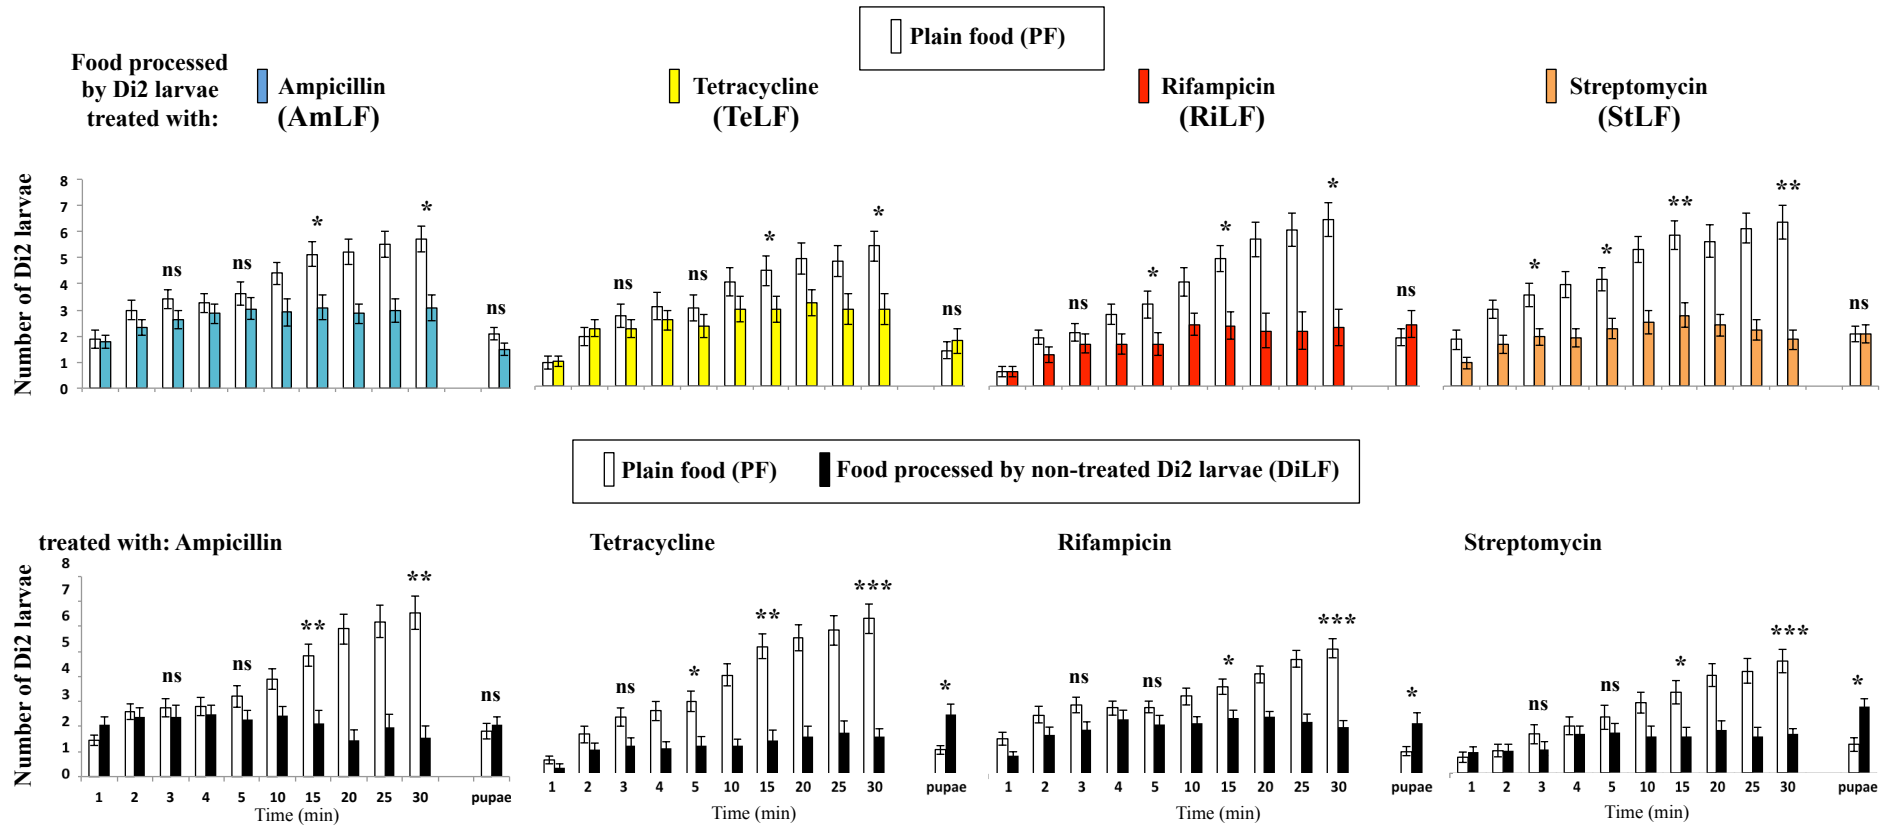

S7 Figure
